# Supplementary material for: DUDE-Seq: Fast, flexible, and robust denoising for targeted amplicon sequencing
Source: PubMed Central journal article supplement (PMC5531809; doi:10.1371/journal.pone.0181463), 2017-07-27
Supplement: pone.0181463.s001.pdf [file pone.0181463.s001.pdf]

## [Supporting Information]

# DUDE-Seq: Fast, Flexible, and Robust Denoising for Targeted Amplicon Sequencing

Byunghan Lee<sup>1</sup>, Taesup Moon<sup>2\*</sup>, Sungroh Yoon<sup>1,3,4\*</sup>, and Tsachy Weissman<sup>5</sup>

<sup>1</sup>*Electrical and Computer Engineering, Seoul National University, Seoul, Korea*

<sup>2</sup>*College of Information and Communication Engineering, Sungkyunkwan University, Suwon, Korea*

<sup>3</sup>*Interdisciplinary Program in Bioinformatics, Seoul National University, Seoul, Korea*

<sup>4</sup>*Neurology and Neurological Sciences, Stanford University, Stanford, California, United States of America*

<sup>5</sup>*Department of Electrical Engineering, Stanford University, Stanford, California, United States of America*

## Source Code Availability and DUDE-Seq Website

The website accompanying DUDE-Seq is available at <http://data.snu.ac.kr/pub/dude-seq>), as shown in Fig. A. For users who prefer a graphical user interface, this website provides a web-based execution environments for DUDE-Seq. Through this screen, a user can specify the parameters for each of the two error types and upload the input file of her choice. The users can upload a .zip file which contains single .dat [1] or .fasta or .fastq file for analysis. If the submitted data is .fasta or .fastq file, we proceed Algorithm 1 alone, otherwise, do Algorithm 2 followed by Algorithm 1. For advanced users who prefer batch processing, the source code of DUDE-Seq is also available at <http://github.com/datasnu/dude-seq>.

All the used datasets are also available on the Sequence Read Archive (SRA) under the accession number SRP000570 (SRS002051–SRS002053) at <https://www.ncbi.nlm.nih.gov/sra/SRP000570> and the European Nucleotide Archive (ENA) under the accession number PRJEB6244 (ERS671332–ERS671344) at <http://www.ebi.ac.uk/ena/data/view/PRJEB6244>.

In addition to denoising by DUDE-Seq, the website provides additional analysis of the sequencing results that should be useful for the downstream analyses. The DUDE-Seq website utilizes PRINSEQ [2] to provide the following statistics to examine and control the quality of sequencing data: the length distribution, the GC content distribution, the occurrence of the ambiguous base Ns, the tag sequence probability, the sequence duplication, and the sequence complexity.

**Length distribution** lists the mean, minimum, maximum, and mode sequence lengths. **GC content distribution** lists the mean, minimum, maximum, and mode GC contents. **Sequence complexity** shown in Fig. B is calculated using the DUST algorithm [3] and block-entropy. The DUST algorithm masks low-complexity regions that have highly biased distribution of nucleotides based on counting 3-mer frequencies in 64-base windows. The block-entropy is calculated using Shannon’s diversity index [4]. **Tag sequence probability** shown in Fig. C is calculated to reveal the existence of artifacts at the ends, *i.e.*, adapter or barcode sequences at the 5’- or 3’-end, according to Schmieder *et al.* [5]. **Sequence duplication** shown in Fig. D is calculated to relieve the artificial

---

\*To whom correspondence should be addressed: tsmoon@skku.edu (TM), sryoon@snu.ac.kr (SY)

# DUDE-Seq: Fast, flexible, and robust denoising of nucleotide sequences

---

## Parameter

The hyperparameters below determine the size of double-sided context:

DUDE-Seq (1):  DUDE-Seq (2):

## File

Upload a **.zip** file which contains single **.dat** or **.fasta** or **.fastq** file: [Get an example input: [fasta](#) or [dat](#)]

No file selected.

Fig. A: **DUDE-Seq web interface**. This is a screenshot of the website accompanying the proposed DUDE-Seq method (<http://data.snu.ac.kr/pub/dude-seq>). For users who prefer a graphical user interface, this website provides a web-based execution environments for DUDE-Seq. Through this screen, a user can specify the parameters for each of the two error types (in the figure, DUDE-Seq (1) stands for for the substitution error correction described in Algorithm 1 and DUDE-Seq (2) stands for the homopolymer error correction shown in Algorithm 2), and upload the input file of her choice. The DUDE-Seq process starts automatically by clicking the “SUBMIT” button. For advanced users who prefer batch processing, the source code of DUDE-Seq is also available at <http://github.com/datasnu/dude-seq>.

duplicates. The duplicates are categorized into five groups [2]: exact duplicates, 5’ duplicates, 3’ duplicates, exact duplicates with the reverse complement of another sequence, and 5’ or 3’ duplicates with the reverse complement of another sequence.

## References

- [1] C. Quince, A. Lanzén, T. P. Curtis, R. J. Davenport, N. Hall, I. M. Head, L. F. Read, and W. T. Sloan, “Accurate determination of microbial diversity from 454 pyrosequencing data,” *Nature methods*, vol. 6, no. 9, p. 639, 2009.
- [2] R. Schmieder and R. Edwards, “Quality control and preprocessing of metagenomic datasets,” *Bioinformatics*, vol. 27, no. 6, pp. 863–864, 2011.
- [3] A. Morgulis, E. M. Gertz, A. A. Schäffer, and R. Agarwala, “A fast and symmetric dust implementation to mask low-complexity dna sequences,” *Journal of Computational Biology*, vol. 13, no. 5, pp. 1028–1040, 2006.
- [4] C. E. Shannon, “A mathematical theory of communication,” *ACM SIGMOBILE Mobile Computing and Communications Review*, vol. 5, no. 1, pp. 3–55, 2001.

## Sequence Complexity

|                        | Value | Sequence                                                                                                                                                                                                                                                                                     |
|------------------------|-------|----------------------------------------------------------------------------------------------------------------------------------------------------------------------------------------------------------------------------------------------------------------------------------------------|
| Minimum DUST score:    | 1     | ATTAGATACCCTGGTAGTCTAGCTGTAAACGATGGATACTAGATGTTGTGGACTCTTTG<br>AGTCTGCAGTGTTCGTAGCTAACCGGTTAAGTATCCCGCCTGGGAAGTATGCTCGCAAGAG<br>TGAAACTCAAAGGAATTGACGGGGGCCCGCACAAAGCGGTGGAGCATGTGGTTTAATTCTGA<br>TGCAACACGAAGAACCTTACCAGGACTTGACATAAAGAGAAGTTTTTTGAGAAGAAAACG<br>TGCTACGGCCTCTTATACAGGTGGTG |
| Maximum DUST score:    | 1     | ATTAGATACCCTGGTAGTCTAGCTGTAAACGATGGATACTAGATGTTGTGGACTCTTTG<br>AGTCTGCAGTGTTCGTAGCTAACCGGTTAAGTATCCCGCCTGGGAAGTATGCTCGCAAGAG<br>TGAAACTCAAAGGAATTGACGGGGGCCCGCACAAAGCGGTGGAGCATGTGGTTTAATTCTGA<br>TGCAACACGAAGAACCTTACCAGGACTTGACATAAAGAGAAGTTTTTTGAGAAGAAAACG<br>TGCTACGGCCTCTTATACAGGTGGTG |
| Minimum Entropy value: | 85    | ATTAGATACCCGGGTAGTCCACGCCGTAAACGATGGATGCTAGCCGTTAGGCAGCTTGCT<br>GCTTAGTGGCGCAGCTAACGCTTTAAGCATCCCGCCTGGGGAGTACGGTCGCAAGATTAA<br>AACTCAAAGGAATTGACGGGGGCCCGCACAAAGCGGTGGAGCATGTGGTTTAATTCTGAAGC<br>AACGCCGAGAACCTTACCAGCTTTTGACATGTCTGGACGGATGGCAGAGATGCTTTCTT<br>CTCTTCGGAGCCAGGAACACAGGG    |
| Maximum Entropy value: | 88    | ATTAGATACCCTGGTAGTCTAGCTGTAAACGATGGATACTAGATGTTGTGGACTCTTTG<br>AGTCTGCAGTGTTCGTAGCTAACCGGTTAAGTATCCCGCCTGGGAAGTATGCTCGCAAGAG<br>TGAAACTCAAAGGAATTGACGGGGGCCCGCACAAAGCGGTGGAGCATGTGGTTTAATTCTGA<br>TGCAACACGAAGAACCTTACCAGGACTTGACATAAAGAGAAGTTTTTTGAGAAGAAAACG<br>TGCTACGGCCTCTTATACAGGTGGTG |

Fig. B: **Website output: sequence complexity.** The DUDE-Seq website provides analysis results from applying the DUST algorithm [3] and block-entropy to the outputs from denoising by DUDE-Seq. The DUST algorithm masks low-complexity regions that have highly biased distribution of nucleotides based on counting 3-mer frequencies in 64-base windows. The block-entropy is calculated using Shannon's diversity index [4].

## Tag Sequence Check

|                              |        |        |
|------------------------------|--------|--------|
|                              | 5'-end | 3'-end |
| Probability of tag sequence: | 100 %  | 22 %   |
| GSMIDs or RLMIDs:            | none   |        |

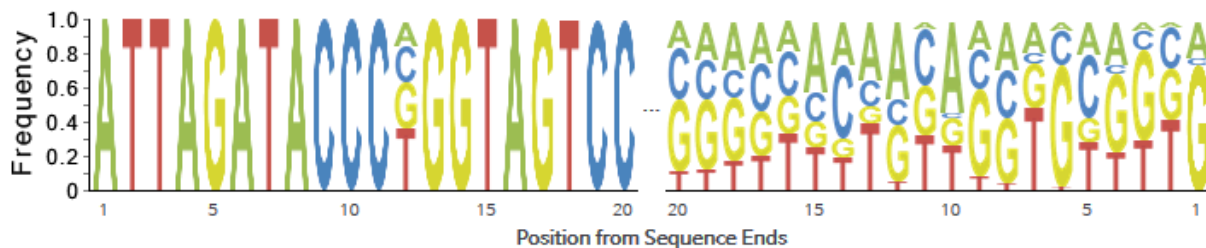

Fig. C: **Website output: tag sequence probability.** Another output from the DUDE-Seq website is the tag sequence probability of reads [5]. This is to reveal the existence of artifacts at the ends, *i.e.*, adapter or barcode sequences at the 5'- or 3'-end.

## Sequence Duplication

|                                            | # Sequences      | Max duplicates |
|--------------------------------------------|------------------|----------------|
| Exact duplicates:                          | 26,326 (82.61 %) | 1422           |
| Exact duplicates with reverse complements: | 0                | 0              |
| 5' duplicates                              | 975 (3.06 %)     | 4              |
| 3' duplicates                              | 0                | 0              |
| 5'/3' duplicates with reverse complements  | 0                | 0              |
| Total:                                     | 27,301 (85.67 %) | -              |

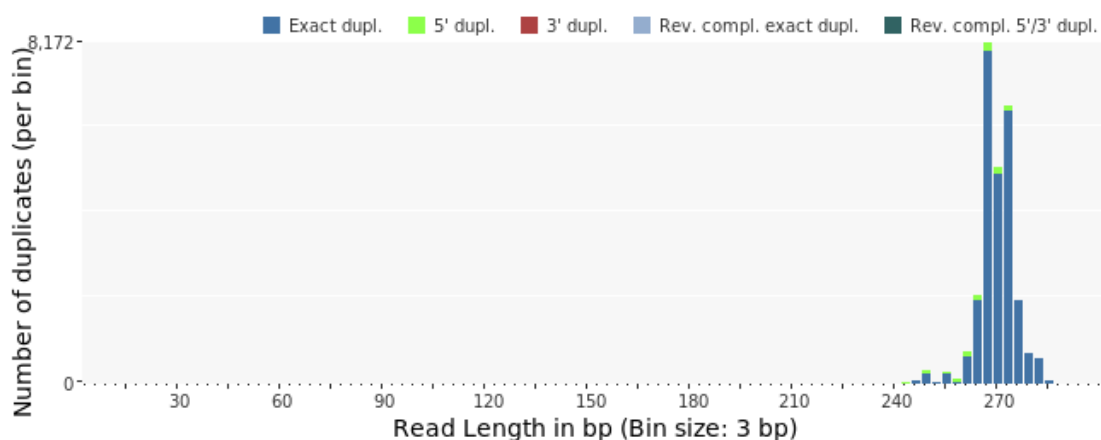

Fig. D: **Website output: sequence duplication.** The accompanying website also carries out sequence duplication analysis based on the denoised outputs from DUDE-Seq, in order to reveal artificial duplicates. As shown in the figure, five types of duplication statistics [2] are provided: exact duplicates, 5' duplicates, 3' duplicates, exact duplicates with the reverse complement of another sequence, and 5' or 3' duplicates with the reverse complement of another sequence.

- [5] R. Schmieder, Y. W. Lim, F. Rohwer, and R. Edwards, "Tagcleaner: Identification and removal of tag sequences from genomic and metagenomic datasets," *BMC bioinformatics*, vol. 11, no. 1, p. 1, 2010.
